1 **Length of hospital stay and associated factors among adult surgical patients**  
2 **admitted to a surgical ward in Amhara Regional State Comprehensive**  
3 **Specialized Hospitals, Ethiopia**

4 Habtamu Hurisa Dadi<sup>1\*</sup>, Netsanet Habte<sup>2</sup>, Yenework Mulu<sup>3</sup>, Yabibal Asfaw<sup>4</sup>

5 <sup>1</sup> Department of Surgical Nursing, School of Nursing, College of Health Sciences and Medicine,  
6 Wolaita Sodo University, Wolaita Sodo, Ethiopia

7 <sup>2</sup> Department of Adult Health Nursing, School of Nursing, College of Medicine and Health  
8 Sciences, University of Gondar, Gondar, Ethiopia

9 <sup>3</sup> Department of Surgical Nursing, School of Nursing, College of Medicine and Health Sciences,  
10 University of Gondar, Gondar, Ethiopia

11 <sup>4</sup> Department of Surgical Nursing, School of Nursing, College of Medicine and Health Sciences,  
12 Woldia University, Woldia, Ethiopia

13 \* Corresponding author

14 E-mail: [habtamuhurisa15@gmail.com](mailto:habtamuhurisa15@gmail.com)

15

16

17

18

19

20

## 21 **Abstract**

### 22 **Introduction**

23 Hospitals across the country are experiencing a rise in the length of hospital stays, ranging from  
24 2% to 14%. As a result, patients who remain hospitalized for a prolonged period are three times  
25 more likely to suffer in-hospital deaths. Therefore, identifying contributing factors for prolonged  
26 hospital stays enhances the ability to improve services and the quality of patient care. However,  
27 there is limited documented evidence in Ethiopia as well as in the study area about factors  
28 associated with prolonged hospital stays among surgical inpatients.

### 29 **Objective**

30 This study aimed to assess the length of hospital stay and associated factors among adult surgical  
31 patients admitted to a surgical ward in Amhara Regional State Comprehensive Specialized  
32 Hospitals, Ethiopia, 2023.

### 33 **Methods**

34 An institutional-based cross-sectional study was conducted among 452 adult surgical patients from  
35 April 17 to May 22, 2023. Data were collected based on a pretested, structured interviewer-  
36 administered questionnaire, patient chart review, and direct measurement. Study participants were  
37 selected using a systematic random sampling technique. The collected data were cleaned, entered  
38 into EpiData 4.6.0 and exported to STATA version 14 for analysis. Binary logistic regression  
39 analysis was used. Variables with a p value < 0.05 in the multivariable logistic regression analysis  
40 were considered statistically significant.

## 41 **Results**

42 In the current study, the prevalence of prolonged hospital stay was 26.5% (95% CI: 22.7–30.8).  
43 Patients referred from another public health institution (AOR = 2.46; 95% CI: 1.09, 5.57), hospital-  
44 acquired pneumonia (AOR = 3.18; 95% CI: 1.28, 7.89), duration of surgery  $\geq$ 110 minutes (AOR  
45 = 2.48; 95% CI: 1.25, 4.91), and preoperative anemia (AOR = 3.37; 95% CI: 1.88, 6.04) were  
46 factors associated with prolonged hospital stays.

## 47 **Conclusion**

48 This study found a significant proportion of prolonged hospital stays. Source of referral,  
49 preoperative anemia, duration of surgery, and hospital-acquired pneumonia were factors  
50 associated with a prolonged hospital stay. Strengthening the established information system among  
51 hospitals when referring patients and early screening and treating anemia upon admission to  
52 hospitals can reduce the length of stays.

53 **Keywords:** Prolonged length of stay, length of hospital stay, surgical patients, Ethiopia

54

55

## 57 **Introduction**

58 Hospital admission is essential for improving patient care and providing them with inpatient  
59 services, which can help save lives [1]. In fact, hospitals play a vital role in the delivery of  
60 healthcare services, and as a result, they significantly affect the efficiency of a health system [2].  
61 Length of stay (LOS) is one of the markers of hospital indicators that is currently utilized regularly  
62 to evaluate hospital efficiency and is defined as the date between admission and discharge [3–5].  
63 However, prolonged LOS is defined as a hospitalized stay that is longer than expected for  
64 particular treatments [6,7].

65 Every year, more than 143 million people in low- and middle-income countries undergo surgical  
66 procedures, which places a substantial strain on the health care system [8]. As a result, hospitals  
67 across the country are experiencing an increase in the length of hospital stays. Just 2% of patients  
68 in 2012 had hospital stays longer than 21 days; now, they account for 14% of hospital days and  
69 cost more than \$20 billion a year [9]. In 2022, patients' median hospitalizations would be nearly  
70 19% higher than they were in 2019, according to statistics from the healthcare consulting company  
71 Strata Decision Technology [10]. In European hospitals, 7.98% to 16.67% of patients experienced  
72 a prolonged length of hospital stay [11–13]. In Asia, studies have shown that 5.4% to 30.5% of  
73 patients had prolonged hospital stays [14–16], and in Africa, 24.7% to 63% of patients experienced  
74 prolonged hospital stays [17–19].

75 Hence, hospitals face significant challenges related to insufficient surgical bed capacity and  
76 inconsistent occupancy rates in surgical units, resulting in frequent last-minute cancellations of  
77 surgeries [20]. This has a great impact on patients, their families, and health services [1,6,13].  
78 However, it should be considered that patients who stay longer than necessary or shorter than is

79 actually needed have an impact on the price and standard of care delivered [21]. Although patients  
80 who stayed for a prolonged time had poor care outcomes [22,23], they faced financial burdens  
81 [24,25], made it difficult for the hospital to run at a high level of efficiency [26,27], were at higher  
82 risk of developing complications [28,29], and had increased mortality [11]. Generally, prolonged  
83 hospital stays are not beneficial for either patients or hospitals [6,30].

84 Studies have revealed that factors such as older age, preoperative hypoalbuminemia, ASA class 3  
85 or 4, duration of operation, in-hospital complications, comorbidity, and reoperation were factors  
86 independently associated with prolonged hospital stays [19,22,25,31,32]. However, there is a lack  
87 of consistency in what influences patients' length of stay, particularly in surgical wards [33]. On  
88 the other hand, this research topic covers a number of previously unexplored aspects that have  
89 attracted research interest, such as postponed surgery, preoperative anemia, functional status, and  
90 source of referral [18,19], which should be investigated further. An investigation of these factors  
91 is necessary to reduce unnecessary stays in the hospital.

92 In an effort to enhance patient care quality and lower hospital costs, many parts of the health system  
93 are working hard to reduce patients' unnecessary hospital stays [21,34] through interdisciplinary  
94 or multidisciplinary care, medication management, and discharge planning tools [33,34]. As in  
95 other countries, the Federal Ministry of Health (FMOH) is trying to improve the quality of surgical  
96 care by launching a strategy to save lives through safe surgery and has implemented the World  
97 Health Organization's surgical safety checklist, which has an effect on reducing the length of  
98 hospital stay [35,36].

99 Although the length of stay (LOS) among patients admitted to surgical units has been declining in  
100 Western nations, it remains high in Africa [17–19,37]. This disparity is a result of the varied  
101 healthcare systems and clinical practices [38], and it may also be due to the lack of utilization of

102 strategies implemented in hospitals related to surgical care, which influences the length of hospital  
103 stays. Moreover, there are inconsistent findings about the efficacy of LOS-reduction measures  
104 such as discharge planning tools, which are usually utilized by healthcare systems [34]. In addition,  
105 there is little published literature on factors that influence the length of hospital stays among  
106 surgical inpatients in Africa and Ethiopia. Therefore, this study aimed to assess the length of  
107 hospital stay and associated factors among adult surgical patients admitted to a surgical ward in  
108 Amhara Regional State comprehensive specialized hospitals, Ethiopia. The results of these  
109 findings provide an additional clue for the Ethiopian healthcare system to gain a better  
110 understanding of factors contributing to prolonged hospital stays with surgical care services.

## 111 **Materials and methods**

### 112 **Study design, period and setting**

113 An institutional-based cross-sectional study was conducted in the adult surgical ward in Amhara  
114 Regional State Comprehensive Specialized Hospitals from April 17 to May 22, 2023. The  
115 University of Gondar, Dessie, Felege Hiwot, and Tibebe Ghion are the four selected  
116 comprehensive specialized hospitals found in the Amhara Regional States. The University of  
117 Gondar is one of the comprehensive specialized hospitals found in the Amhara Regional State.  
118 This hospital serves more than 5 million people in its catchment area. There are more than 906  
119 (463 nurses) healthcare professionals and 40 beds in the surgical ward [39]. The average monthly  
120 surgical patient admission was 106.

121 Tibebe Ghion and Felege Hiwot comprehensive specialized hospitals are found in Bahir Dar, the  
122 capital of Amhara Regional State, which is 565 kilometers away from Addis Ababa and serves  
123 more than 5 million people in each hospital. They have 105 and 66 beds in the surgical ward,

124 respectively [40]. The average monthly surgical patient admissions were 335 and 168,  
125 respectively.

126 Dessie Comprehensive Specialized Hospital, found in northeastern Ethiopia. The Dessie city  
127 administration is found far from Bahir Dar (481 kilometers), which is the capital city of Amhara  
128 regional state, and 401 kilometers from Addis Ababa, the capital city of Ethiopia. The Dessie  
129 Comprehensive hospital serves a population of 5 million, has 603 health care workers, and has 66  
130 beds in the surgical ward [41]. The average monthly surgical patient admission was 141.

## 131 **Population**

132 All adult ( $\geq 18$  years) surgical patients who underwent surgery and were admitted to a surgical  
133 ward in Amhara Regional State Comprehensive Specialized Hospitals were the source population,  
134 and all adult ( $\geq 18$  years) surgical patients who underwent surgery and were admitted to a surgical  
135 ward in selected Amhara Regional State Comprehensive Specialized Hospitals during the study  
136 period were the study population.

## 137 **Inclusion and exclusion criteria**

138 All sampled adult surgical patients who underwent both elective and emergency surgery and were  
139 admitted to a surgical ward in selected Amhara Regional State CSHs were included. The study  
140 excluded patients who were unable to communicate because of their illness and orthopedic  
141 patients.

## 142 **Sample size determination**

143 The sample size was determined using a single population proportion formula with the following  
144 assumptions:

145  $n$  = sample size

146  $Z_{\alpha/2}$  = significance level = 95% CI = 1.96,  $d$  = margin of error of 0.05, and proportion of prolonged  
147 length of hospital stay from a previous study at Jimma Hospital (P), 25.3% [18].

148 
$$n = \frac{(Z_{\alpha/2})^2 p (1-p)}{d^2}$$

149 
$$d^2$$

150 
$$n = \frac{(1.96)^2 0.253 (0.747)}{(0.05)^2} = 290$$

151 
$$(0.05)^2$$

152 By considering 1.5 design effects and adding a 5% (22) nonresponse rate, the total sample size  
153 was 457. The sample sizes for factors were also calculated by using EpiInfo version 7.2. Based on  
154 the results, the proportion of patients with a prolonged length of hospital stay was used for the final  
155 sample size.

## 156 **Sampling procedure**

157 From eight comprehensive specialized hospitals in the Amhara Regional States, four were selected  
158 by lottery, such as the University of Gondar, Dessie, Felege Hiwot, and Tibebe Ghion  
159 comprehensive specialized hospitals. The total number of patients who underwent surgery and  
160 were admitted to a surgical ward in those hospitals in the last month before data collection was  
161 750. Then, based on their population sizes, the sample size was proportionally distributed among  
162 them using the proportional allocation formula. After that, eligible study participants were enrolled  
163 using a systematic random sampling technique. Then, the lottery method was employed to identify  
164 the first study participant to interview, and then every other study participant was selected until  
165 the needed sample size was obtained.

## 166 **Study variables**

### 167 **Dependent variable**

168 Length of hospital stays (Prolonged, Normal)



## 169 **Independent variables**

170 Sociodemographic factors (age, sex, marital status, educational status, residency, occupation,  
171 economic status, and health insurance)

172 Admission-related factors (type of surgery admission (elective or emergency), time of admission,  
173 and source of referral)

174 Clinical factors (comorbidity, type of surgical procedure, in-hospital complications, duration of  
175 surgery (in minutes), reoperation, postponed operations, preoperative anemia, body mass index  
176 and functional status)

177 Behavioral factors (smoking status and alcohol status)

## 178 **Operational definitions**

179 **Length of hospital stay:** described as the length of a single hospitalization, which is determined  
180 by subtracting the day of discharge from the day of admission.

181 **Prolonged LOS:** defined as an LOS greater than or equal to the 75<sup>th</sup> percentile in hospitals for the  
182 entire study population that was at least 14 days in this study (Prolonged coded as 1, Normal coded  
183 as 0) [[11](#)].

184 **Normal LOS:** defined as LOS less than the 75<sup>th</sup> percentile for the entire study population

185 **In-hospital complications:** The occurrence of new medical issues upon admission that were seen  
186 as negative incidents arising from the course of care and therapy rather than the course of the  
187 disease, such as pressure injuries, falls, healthcare-associated infections (HAIs), surgical  
188 complications, respiratory complications, cardiac complications, venous thromboembolism, renal  
189 failure, gastrointestinal bleeding, and adverse drug events. HAIs were further classified into  
190 specific types, such as central-line associated bloodstream, catheter-associated urinary tract

191 infection, hospital-acquired pneumonia, ventilator-associated pneumonia, and surgical site  
192 infections [42].

193 **Preoperative anemia:** defined as hemoglobin (Hb) levels below 12.0 g/dL in women and 13.0  
194 g/dL in males, was considered anemia, according to the World Health Organization (WHO) [43].

195 **The duration of surgery:** was defined as the time from the first incision to wound closure [44].

## 196 **Data collection tools and procedures**

197 The data were collected from adult surgical patients admitted to a surgical ward using a pretested,  
198 structured interviewer-administered questionnaire, patient chart review, and direct measurement.

199 The data collection instrument was adapted from previously published studies [17–19], whereas  
200 wealth index assessment questions were adopted from EDHS 2016 [45], and the functional status

201 assessment tool was adopted from the Katz Index of Assessing Tool [46]. The questionnaire had

202 sociodemographic information, wealth index assessment questions, admissions-related

203 characteristics, clinical variables, behavioral information, and the Katz Index of functional status

204 assessment tools. The data collectors were four BSc nurse professionals and three MSc nurse

205 supervisors. The collected data were checked daily for consistency and accuracy.

## 206 **Data quality control measures**

207 The questionnaires were translated into Amharic and back into English to maintain consistency.

208 In this study, two senior surgical clinicians and two researchers checked for face validity. One-day

209 training was given for data collectors and supervisors by the principal investigator on how to

210 collect data, the objective of the study, contents of the questionnaire, timely collection, ethical

211 issues, and interviewing technique. Continuous supervision was provided on the spot by the

212 principal investigator and supervisors. The questionnaire was pretested on 5% (23) of the sample

213 at Debre Tabor Comprehensive Specialized Hospital (DTCSH) before actual data collection to

214 check acceptability and consistency. Depending on the result of the pretest, necessary  
215 modifications were made to ensure the clarity and completeness of the questionnaire. Finally,  
216 before beginning entry into EpiData version 4.6.0, the data were cleared, categorized, compiled,  
217 and checked for completeness and accuracy.

## 218 **Data processing and analysis**

219 EpiData version 4.6.0 was used to code and enter data, which were exported to STATA version  
220 14 (StataCorp, College Station, TX, USA) for analysis. Descriptive statistics such as frequency  
221 and percentage were used to summarize the study population. Continuous variables were expressed  
222 using measures of central tendency and variability, such as the mean, median and interquartile  
223 range (IQR). A binary logistic regression model was fitted. A variable with a p value  $< 0.25$  was  
224 used to select potential candidates for multivariable analysis, and variables with a p value  $< 0.05$   
225 were considered significantly associated with the outcome variable. An odds ratio with a 95% CI  
226 was used as a measure of association. The results are presented in tables and graphs. The presence  
227 of multicollinearity among independent variables was checked by the variance inflation factor  
228 (VIF = mean 1.54). The Hosmer–Lemeshow tests indicated that the model fit the data well (p =  
229 0.75).

## 230 **Ethical consideration**

231 Ethical clearance was obtained from the ethical review committee of the nursing school on behalf  
232 of the Institutional Review Board (IRB) of the University of Gondar with Ref. Number  
233 (S/N/175/2015). A support letter of cooperation was written to the Amhara Public Health Institute  
234 and comprehensive specialized hospitals of Amhara Regional States. Then, permission was  
235 obtained to undertake the study from the administrative offices of comprehensive specialized

236 hospitals in the Amhara Regional States. All the study participants received written informed  
237 consent. The data collectors provided a brief overview of the study's primary aim. To ensure  
238 anonymity, respondent names and other identifiable information were not included. Finally, it was  
239 made clear to study participants that their answers to private questions were confidential, and they  
240 were free to end the interview at any time and not respond to any questions. Password protection  
241 and proper disposal were used to protect the acquired data.

## 242 **Results**

### 243 **Sociodemographic characteristics of the participants**

244 In this study, 452 adult surgical patients participated, with a response rate of 99%. Approximately  
245 two-thirds, 63.05% (285), were male, and the median age was 38 years old, with nearly one-third,  
246 29.42% (133), being within the age range of 25–34 years old. Most, 76.8% (347), were married,  
247 and more than half, 57.1% (258), were rural dwellers. Around half 47.35% (214) of the participants  
248 were farmers, and one-third of the study participants 33.85% (153) were within the lower wealth  
249 index. Three-fourths, 75% (339), had health insurance ([Table 1](#)).

250 **Table 1. Sociodemographic characteristics of adult surgical patients admitted to a surgical**  
251 **ward in Amhara Regional State Comprehensive Specialized Hospitals, Ethiopia, 2023 (n =**  
252 **452).**

| <b>Variables</b>              | <b>Category</b> | <b>Frequency</b> | <b>Percent (%)</b> |
|-------------------------------|-----------------|------------------|--------------------|
| Sex                           | Male            | 285              | 63.05              |
|                               | Female          | 167              | 36.95              |
| Age (in years)<br>(Median=38) | 18-24           | 62               | 13.72              |
|                               | 25-34           | 133              | 29.42              |

253 (Continued)

254 **Table 1.** (Continued)

| <b>Variables</b>    | <b>Category</b>         | <b>Frequency</b> | <b>Percent (%)</b> |
|---------------------|-------------------------|------------------|--------------------|
| Age (in years)      | 35-44                   | 88               | 19.47              |
|                     | 45-54                   | 68               | 15.04              |
|                     | 55-64                   | 48               | 10.62              |
|                     | ≥65                     | 53               | 11.73              |
| Marital status      | Married                 | 347              | 76.77              |
|                     | Single                  | 56               | 12.39              |
|                     | Widowed                 | 37               | 8.19               |
|                     | Divorced                | 12               | 2.65               |
| Residency           | Urban                   | 194              | 42.9               |
|                     | Rural                   | 258              | 57.1               |
| Occupational status | Farmer                  | 214              | 47.35              |
|                     | Employed                | 80               | 17.7               |
|                     | Merchant                | 49               | 10.84              |
|                     | Housewife               | 34               | 7.52               |
|                     | Student                 | 40               | 8.85               |
|                     | Daily labor             | 24               | 5.31               |
|                     | Others <sup>a</sup>     | 11               | 2.43               |
| Educational level   | No formal education     | 190              | 42.04              |
|                     | Primary (1-8) school    | 99               | 21.9               |
|                     | Secondary (9-12) school | 67               | 14.82              |
|                     | College and above       | 96               | 21.24              |
| Wealth index        | Lower                   | 153              | 33.85              |
|                     | Middle                  | 151              | 33.41              |
|                     | Higher                  | 148              | 32.74              |
| Health insurance    | Yes                     | 339              | 75                 |
|                     | No                      | 113              | 25                 |

255 <sup>a</sup> Retried, and jobless.

## 256 Admission-related characteristics

257 Among 452 study participants, nearly two-thirds 63.72% (288) had undergone elective surgery.  
258 The majority, 82.74% (374), admitted during the day, and 72.35% (327) presented directly from  
259 their home ([Table 2](#)).

260 **Table 2. Admission-related characteristics of adult surgical patients admitted to a surgical**  
261 **ward in Amhara Regional State Comprehensive Specialized Hospitals, Ethiopia, 2023**  
262 **(n=452).**

| Variables                 | Category                   | Frequency | Percent (%) |
|---------------------------|----------------------------|-----------|-------------|
| Type of surgery admission | Emergency                  | 164       | 36.28       |
|                           | Elective                   | 288       | 63.72       |
| Time of admission         | Day time                   | 374       | 82.74       |
|                           | Night time                 | 78        | 17.26       |
| Source of referral        | Home                       | 327       | 72.35       |
|                           | Public health institution  | 105       | 23.23       |
|                           | Private health institution | 20        | 4.42        |

## 263 Clinical characteristics

264 Out of 452 study participants, 4.65% (21) had postponed surgery, and 11.06% (50) had comorbid  
265 conditions. Two-thirds, 68.14% (308), underwent general surgery, followed by urologic  
266 procedures, 19.69% (89). During their hospital stay, 7.96% (36) developed hospital-acquired  
267 pneumonia (HAP), and 3.76% (17) experienced surgical site infection (SSI). More than one-third  
268 (38.94%, 176) of the participants had surgeries that lasted  $\geq 110$  minutes, and 22.57% (102) had  
269 preoperative anemia. Furthermore, 17.92% (81) had a low body mass index, and more than half,  
270 51.33% (232), of them were partially dependent on their functional status ([Table 3](#)).

271

272 **Table 3. Clinical features of adult admitted surgical patients in Amhara Regional State**  
 273 **Comprehensive Specialized Hospitals, Ethiopia, 2023 (n = 452).**

| <b>Variables</b>                    | <b>Category</b>           | <b>Frequency</b> | <b>Percent (%)</b> |
|-------------------------------------|---------------------------|------------------|--------------------|
| Postponed surgery                   | Yes                       | 21               | 4.64               |
|                                     | No                        | 434              | 95.35              |
| Reason for postponed surgery (n=21) | Lack of blood for surgery | 11               | 2.43               |
|                                     | Investigation not done    | 4                | 0.88               |
|                                     | Lack of funds             | 4                | 0.88               |
|                                     | Others <sup>a</sup>       | 2                | 0.44               |
| Comorbidity                         | Yes                       | 50               | 11.06              |
|                                     | No                        | 402              | 88.94              |
| Type of comorbid conditions (n=57)  | Hypertension              | 18               | 3.98               |
|                                     | Diabetes mellitus         | 15               | 3.32               |
|                                     | Throid disease            | 13               | 2.87               |
|                                     | Others <sup>b</sup>       | 11               | 2.43               |
| Type of Surgery procedures          | General surgery           | 308              | 68.14              |
|                                     | Urology                   | 89               | 19.69              |
|                                     | Neurology                 | 28               | 6.19               |
|                                     | Plastic surgery           | 16               | 3.54               |
|                                     | Cardiothoracic surgery    | 7                | 1.55               |
|                                     | Vascular surgery          | 4                | 0.88               |
| In-hospital complications           |                           |                  |                    |
| Surgical site infection             | Yes                       | 17               | 3.76               |
|                                     | No                        | 435              | 96.24              |

274 (Continued)

275

276

277 **Table 3.** (Continued)

| <b>Variables</b>              | <b>Category</b>     | <b>Frequency</b> | <b>Percent (%)</b> |
|-------------------------------|---------------------|------------------|--------------------|
| HAP                           | Yes                 | 36               | 7.96               |
|                               | No                  | 416              | 92.04              |
| Urinary tract infection       | Yes                 | 10               | 2.21               |
|                               | No                  | 442              | 97.79              |
| Wound dehiscence              | Yes                 | 14               | 3.10               |
|                               | No                  | 448              | 96.90              |
| Pressure ulcer                | Yes                 | 7                | 1.55               |
|                               | No                  | 445              | 98.45              |
| Sepsis/septic shock           | Yes                 | 7                | 1.55               |
|                               | No                  | 446              | 98.45              |
| DVT                           | Yes                 | 3                | 0.66               |
|                               | No                  | 449              | 99.34              |
| Reoperation                   | Yes                 | 23               | 5.09               |
|                               | No                  | 429              | 94.91              |
| Number of reoperation (n=23)  | ≤ 1                 | 18               | 3.98               |
|                               | >1                  | 5                | 1.11               |
| Duration of surgery (minutes) | ≤70                 | 161              | 35.62              |
|                               | 70-110              | 115              | 25.44              |
|                               | ≥110                | 176              | 38.94              |
| Preoperative anemia           | Yes                 | 102              | 22.57              |
|                               | No                  | 350              | 77.43              |
| Body mass index               | Underweight         | 81               | 17.92              |
|                               | Normal              | 336              | 74.34              |
|                               | Overweight          | 35               | 7.74               |
| Functional status             | Independent         | 217              | 48.01              |
|                               | Partially dependent | 232              | 51.33              |
|                               | Fully dependent     | 3                | 0.66               |

278 DVT, deep vein thrombosis; HAP, hospital acquired pneumonia.

279 <sup>a</sup> Holiday date, shortage of time.

280 <sup>b</sup> Peptic ulcer disease, stroke.



## 281 Behavioral characteristics of the study participants

282 Among the study participants, 41.59% (188) currently consumed alcohol, whereas the majority,  
283 90.71% (410) of the respondents, reported that they were never cigarette smokers ([Table 4](#)).

284 **Table 4. Behavioral characteristics of adult surgical patients admitted to a surgical ward in**  
285 **Amhara Regional State Comprehensive Specialized Hospitals, Ethiopia, 2023 (n = 452).**

| Variables               | Category     | Frequency | Percent (%) |
|-------------------------|--------------|-----------|-------------|
| Alcohol drinking status | Never        | 133       | 29.2        |
|                         | Current      | 188       | 41.59       |
|                         | Past drinker | 131       | 28.98       |
| Smoking status          | Never        | 410       | 90.71       |
|                         | Current      | 29        | 6.42        |
|                         | Former       | 13        | 2.88        |

286

## 287 Length of hospital stay

288 In the current study, the prevalence of prolonged hospital stays was 26.5% (95% CI: 22.7–30.8).

289 The average length of hospital stay was 9.38 (SD:  $\pm 7.31$ ) days. The minimum and maximum  
290 lengths of hospital stays were 2 and 60 days, respectively ([Fig 1](#)). The highest average length of  
291 hospital stay occurred among those who underwent cardiothoracic surgery, followed by plastic  
292 surgery procedures ([Fig 2](#)).

293

294 **Fig 1. Proportion of length of hospital stays among adult surgical patients admitted to a**  
295 **surgical ward in Amhara Regional State Comprehensive Specialized Hospitals, Ethiopia,**  
296 **2023 (n=452).**

297

298 **Fig 2. Average length of hospital stays among adult surgical patients admitted to a surgical**  
299 **ward in Amhara Regional State Comprehensive Specialized Hospitals, Ethiopia, 2023**  
300 **(n=452).**

### 301 **Factor associated with prolonged length of hospital stay**

302 In the bivariable analysis, sex, marital status, health insurance, educational status, type of surgery  
303 admission, source of referral, time of admission, body mass index, wealth index, HAP, surgical  
304 site infection (SSI), reoperation, preoperative anemia, alcohol status, and duration of surgery were  
305 factors associated with prolonged LOS. However, only four variables, source of referral, HAP,  
306 preoperative anemia, and duration of surgery, were significantly associated with prolonged LOS  
307 in multivariable logistic regression analysis.

308 The odds of having prolonged LOS were 2.5 times (AOR = 2.46; 95% CI: 1.09–5.57) higher  
309 among patients referred from another public health institution compared with those presented  
310 directly from home. The odds of having prolonged LOS were 3.2 times (AOR = 3.18; 95% CI:  
311 1.28–7.89) greater among patients who developed hospital-acquired pneumonia than among those  
312 who had no HAP. Patients who had surgery lasting  $\geq 110$  minutes were 2.5 times (AOR = 2.48;  
313 95% CI: 1.25–4.91) more likely to have prolonged LOS than those who had an operation time of  
314  $\leq 70$  minutes. Furthermore, the odds of having prolonged LOS were 3.4 times (AOR = 3.37; 95%  
315 CI: 1.88–6.04) higher among preoperative anemia patients than among those who had no  
316 preoperative anemia ([Table 5](#)).

317

318

319 **Table 5. Bivariable and multivariable analysis of factors associated with the length of**  
 320 **hospital stay among adult surgical patients admitted to a surgical ward in Amhara Regional**  
 321 **State Comprehensive Specialized Hospital, Ethiopia, 2023 (n = 452).**

| Variables                 | Length of hospital stays |                   | COR (95% CI)      | AOR (95% CI)      |
|---------------------------|--------------------------|-------------------|-------------------|-------------------|
|                           | Prolonged<br>No. (%)     | Normal<br>No. (%) |                   |                   |
| <b>Sex</b>                |                          |                   |                   |                   |
| Male                      | 91 (31.93)               | 194 (68.07)       | 2.23 (1.39, 3.57) | 1.60 (0.88, 2.92) |
| Female                    | 29 (17.37)               | 138 (82.63)       | 1                 | 1                 |
| <b>Marital status</b>     |                          |                   |                   |                   |
| Married                   | 81 (23.4)                | 266 (76.66)       | 0.43 (0.13, 1.37) | 0.28 (0.06, 1.23) |
| Single                    | 23 (41.07)               | 33 (58.93)        | 0.98 (0.27, 3.45) | 0.60 (0.12, 3.01) |
| Widowed                   | 11 (29.73)               | 26 (70.27)        | 0.59 (0.15, 2.27) | 0.61 (0.11, 3.22) |
| Divorced                  | 5 (41.67)                | 7 (58.33)         | 1                 | 1                 |
| <b>Educational status</b> |                          |                   |                   |                   |
| No formal education       | 55 (28.95)               | 135 (71.05)       | 1.76 (0.96, 3.22) | 0.79 (0.25, 2.44) |
| Primary school (1-8)      | 31 (31.31)               | 68 (68.69)        | 1.97 (1.01, 3.84) | 0.73 (0.23, 2.34) |
| Secondary school (9-12)   | 16 (23.88)               | 51 (11.3)         | 1.35 (0.43, 1.59) | 0.57 (0.20, 1.62) |
| College and above         | 18 (18.75)               | 78 (81.25)        | 1                 | 1                 |
| <b>Wealth index</b>       |                          |                   |                   |                   |
| Lower                     | 55 (35.95)               | 98 (64.05)        | 2.76 (1.61, 4.74) | 1.77 (0.59, 2.41) |
| Middle                    | 40 (26.49)               | 111 (73.51)       | 1.77 (1.01, 3.10) | 1.41 (0.54, 3.63) |
| Higher                    | 25 (16.89)               | 123 (83.11)       | 1                 | 1                 |
| <b>Health insurance</b>   |                          |                   |                   |                   |
| Yes                       | 95 (28.02)               | 244 (71.98)       | 1.37 (0.82, 2.27) | 1.07 (0.45, 2.51) |
| No                        | 25 (22.12)               | 88 (77.88)        | 1                 | 1                 |

322 (Continued)

323

324 **Table 5.** (Continued)

| Variables                                | Length of hospital stays |                   | COR (95% CI)      | AOR (95% CI)               |
|------------------------------------------|--------------------------|-------------------|-------------------|----------------------------|
|                                          | Prolonged<br>No. (%)     | Normal<br>No. (%) |                   |                            |
| <b>Type of surgery admission</b>         |                          |                   |                   |                            |
| Emergency                                | 69 (42.07)               | 95 (57.93)        | 3.37 (2.19, 5.21) | 1.02 (0.43, 2.45)          |
| Elective                                 | 51 (17.71)               | 237 (82.29)       | 1                 | 1                          |
| <b>Time of admission</b>                 |                          |                   |                   |                            |
| Day time                                 | 80 (21.39)               | 294 (78.61)       | 1                 | 1                          |
| Night time                               | 40 (51.28)               | 38 (48.72)        | 3.87 (2.32, 6.43) | 1.14 (0.52, 2.51)          |
| <b>Source of referral</b>                |                          |                   |                   |                            |
| Home                                     | 59 (18.04)               | 268 (81.96)       | 1                 | 1                          |
| Public health institutions               | 54 (51.43)               | 51 (48.57)        | 4.80 (2.99, 7.73) | <b>2.46 (1.09, 5.57) *</b> |
| Private health institution               | 7 (35)                   | 13 (65)           | 2.44 (0.93, 6.39) | 1.78 (0.48, 6.58)          |
| <b>Body mass index</b>                   |                          |                   |                   |                            |
| Normal                                   | 74 (22.02)               | 262 (77.98)       | 1                 | 1                          |
| Underweight                              | 34 (41.98)               | 47 (58.02)        | 2.56 (1.53, 4.27) | 1.61 (0.82, 3.15)          |
| Overweight                               | 12 (34.29)               | 23 (65.71)        | 1.84 (0.87, 3.88) | 1.78 (0.69, 4.58)          |
| <b>HAP</b>                               |                          |                   |                   |                            |
| Yes                                      | 22 (61.11)               | 14 (38.89)        | 5.09(2.51, 10.34) | <b>3.18 (1.28, 7.89) *</b> |
| No                                       | 98 (23.56)               | 318 (76.44)       | 1                 | 1                          |
| <b>Surgical site infection</b>           |                          |                   |                   |                            |
| Yes                                      | 10 (58.82)               | 7 (41.18)         | 4.22(1.56, 10.22) | 2.29 (0.65, 8.09)          |
| No                                       | 110 (25.29)              | 325 (74.71)       | 1                 | 1                          |
| <b>Duration of surgery<br/>(minutes)</b> |                          |                   |                   |                            |
| ≤70                                      | 25 (15.53)               | 136 (84.47)       | 1                 | 1                          |
| 70-110                                   | 15 (13.04)               | 100 (86.96)       | 0.816(0.41, 1.63) | 0.72 (0.32, 1.64)          |
| ≥110                                     | 80 (45.45)               | 96 (54.55)        | 4.53 (2.69, 7.62) | <b>2.48 (1.25, 4.91)**</b> |

326 **Table 5.** (Continued)

| Variables                  | Length of hospital stays |                   | COR (95% CI)      | AOR (95% CI)                 |
|----------------------------|--------------------------|-------------------|-------------------|------------------------------|
|                            | Prolonged<br>No. (%)     | Normal<br>No. (%) |                   |                              |
| <b>Reoperation</b>         |                          |                   |                   |                              |
| Yes                        | 12 (52.17)               | 11 (47.83)        | 3.24 (1.39, 7.56) | 0.63 (0.21, 1.93)            |
| No                         | 108 (25.17)              | 321 (74.83)       | 1                 | 1                            |
| <b>Preoperative anemia</b> |                          |                   |                   |                              |
| Yes                        | 53 (51.96)               | 49 (48.04)        | 4.57 (2.85, 7.31) | <b>3.37 (1.88, 6.04) ***</b> |
| No                         | 67 (19.14)               | 283 (80.86)       | 1                 | 1                            |
| <b>Alcohol status</b>      |                          |                   |                   |                              |
| Never                      | 28 (21.05)               | 105 (78.95)       | 1                 | 1                            |
| Current                    | 75 (39.89)               | 113 (60.11)       | 2.48 (1.49, 4.14) | 1.49 (0.77, 2.90)            |
| Past drinker               | 17 (12.98)               | 114 (87.02)       | 0.55 (0.28, 1.08) | 0.55 (0.24, 1.26)            |

327 HAP, hospital acquired pneumonia; CI, confidence interval; AOR, adjusted odds ratio; COR,  
328 crudes odds ratio.

329 \*P value < 0.05; \*\*P value < 0.01; \*\*\*P value <0.001 and 1-reference.

330

331

332

333

334

335

## 336 **Discussion**

337 Assessing the length of hospital stay among surgical patients admitted to the surgical ward is one  
338 of the most helpful approaches to assess the quality of surgical treatment given to patients.  
339 Additionally, identifying patients who have prolonged hospital stays could be a useful strategy for  
340 lowering the unnecessary length of stay (LOS) in hospitals.

341 According to the findings of the current study, 26.5% experienced prolonged LOS. This finding is  
342 consistent with previous studies done in Oman (30.5) [16], Boston (27.7%) [47], and Jimma  
343 University Medical Center (JUMC) (25.3%) [18]. However, higher than the study conducted in  
344 Australia (9.7%) [11], the Philippines (19.17%) [15], the USA (22%) [48], 18 Polish and German  
345 surgical centers (4.92%) [49], and Saudi Arabia (21%) [50]. This discrepancy may be due to  
346 advancements in the health care system and the fact that most of the care is provided by specialist  
347 healthcare professionals in developed countries, which is difficult in low- and middle-income  
348 countries. Moreover, in 18 Polish and German surgical centers, the difference may be due to  
349 patients who had at least 8 days of hospital stay, which was considered prolonged LOS [49].  
350 Studies have shown that there are numerous barriers that developing countries face in providing  
351 high-quality surgical care [51].

352 On the other hand, this study result is lower than the study conducted in Nigeria (63%) [17] and  
353 Thailand (54.9%) [52]. In the case of Nigeria, this discrepancy may be due to the study period and  
354 the lower cutoff points used, which were at least 7 days, which is less than the cutoff point used in  
355 this study. In Thailand, the difference may be due to the source population; the study was  
356 performed on patients who had a fractured neck of the femur. According to a study, fractured  
357 patients had a longer hospital stay than other surgical patients [53].

358 The current study revealed that the source of referral, preoperative anemia, HAP, and duration of  
359 surgery had a statistically significant association with prolonged LOS. This study found that  
360 referred patients from another public health institution were more likely to have a prolonged  
361 hospital stay than those presented directly from home. This finding is supported by previous  
362 studies conducted in Australia and the USA [28,54]. There was no clear reason why referred  
363 patients experienced prolonged LOS. However, a possible explanation may be that patients who  
364 have been referred may need more time and resources to treat because they may be sicker than  
365 patients who have not been referred. As a result, these factors increased their treatment durations  
366 and investigations, which in turn increased their length of hospital stay. Additionally, the length  
367 of hospital stays is increased by inadequate systems for exchanging patient information among  
368 hospitals when referring [55]. A key area emerging from the current results is that the source of  
369 referral is one of the factors that leads to prolonged hospital stays.

370 The present study found that patients who had preoperative anemia were 3.4 times more likely to  
371 have a prolonged hospital stay than those without preoperative anemia. This result is in line with  
372 the studies conducted in Singapore and Germany [31,43]. The possible reason may be due to  
373 untreated preoperative anemia related to complications following a surgical procedure as well as  
374 a higher demand for blood transfusion and hence prolonged LOS [31]. An additional explanation  
375 may be that patients with anemia frequently experience fatigue and dizziness, which can make it  
376 difficult for patients to participate in their own therapy. As a result, this may extend the hospital  
377 stay. Studies have shown that early detection of anemic patients is essential in the context of  
378 surgical planning (at least 2-4 weeks prior to surgery). In emergency cases, parenteral substitution  
379 with iron as directed at the end of surgery or postoperatively, especially in cases of perioperative

380 blood loss of more than 500 ml, can improve treatment outcomes [43]. This finding suggests that  
381 having preoperative anemia tends to extend hospital stays for patients.

382 This study revealed that patients who had hospital-acquired pneumonia were 3.2 times more likely  
383 to have prolonged LOS than those who had no HAP. This finding is consistent with a study  
384 conducted in the USA [47]. The possible explanation may be related to the fact that the innate  
385 immune system predominantly directs its cells to fight a lung infection and has a delayed response  
386 to wound healing, which in turn leads to an increased duration of treatment and hospital stay [56].  
387 The result holds implications for the presence of hospital-acquired pneumonia and how it impacts  
388 the length of hospital stays for patients.

389 The current study found that patients who had a duration of surgery lasting  $\geq 110$  minutes were 2.5  
390 times more likely to have a prolonged LOS than those who had a duration of surgery  $\leq 70$  minutes.  
391 This result is supported by several previous studies conducted in Japan, China, and the USA  
392 [22,32,57]. The possible reason may be that an increased operating duration is usually related to a  
393 more complicated case, a higher risk of intraoperative complications, and an increase in estimated  
394 blood loss (EBL). These factors may in turn affect the patient's recovery and result in a prolonged  
395 hospital stay [22]. This finding suggests that having prolonged surgery is one of the significant  
396 factors that increases the duration of hospital stays. The limitations of this study were biased  
397 toward social desirability and recall bias. These were minimized by a detailed explanation of the  
398 study's aims, used anonymously, interviews conducted separately, and chart review.

## 399 **Conclusion**

400 This study found a significant proportion of prolonged hospital stays. Source of referral,  
401 preoperative anemia, duration of surgery, and hospital-acquired pneumonia were factors  
402 associated with a prolonged hospital stay. Therefore, strengthening the established information



403 system among hospitals is better for exchanging patient information when referring patients.  
404 Ensuring that referred patients have received necessary treatments and investigations at hospitals.  
405 Screening and treating patients for anemia is advisable before conducting surgery. Healthcare  
406 providers should use standard safety checklists and precautions for infection prevention to enhance  
407 the quality of care. Future researchers should consider additional hospital-related factors and  
408 factors that can be controlled by the healthcare system and use mixed methods of study to  
409 determine more factors associated with prolonged hospital stays.

410 **Acronyms:** AOR, adjusted odds ratio; BMI, body mass index; CI, confidence interval;  
411 CSHs, comprehensive specialized hospitals; DCSH, Dessie Comprehensive Specialized Hospital;  
412 DTCSH, Debre Tabor Comprehensive Specialized Hospital; FHCSH, Felege Hiwot  
413 Comprehensive Specialized Hospital; HAP, Hospital Acquired Pneumonia; LOS, length of stay;  
414 PLOS, prolonged length of stay; TGCSH, Tibebe Ghion Comprehensive Specialized Hospital;  
415 UoGCSH, University of Gondar Comprehensive Specialized Hospital; USA, United States of  
416 America; WHO, World Health Organization.

#### 417 **Data Sharing Statement**

418 Data are available by contacting the corresponding author.

#### 419 **Consent for Publication**

420 All the participants consented to publish the study in this journal.

421

422

## 423 **Acknowledgments**

424 First, I would like to thank the University of Gondar, College of Medicine and Health Sciences,  
425 and the School of Nursing for providing me with the opportunity to pursue this master's program.  
426 Moreover, I would like to thank the data collectors, supervisors and all the study participants for  
427 their time and willingness to take part in the study.

## 428 **Funding**

429 There is no funding available.

## 430 **Disclosure**

431 The authors declare they have no competing interests.

## 432 **References**

- 433 1. Ossai CI, Wickramasinghe N, Australia EH. Extended Length of Hospital Stay for Surgical and  
434 Medical Patients – Insights from Hospital and Psychosocial Predictors. HICSS. 2022. p. 1–10.
- 435 2. Joseph Gholson J, Noiseux NO, Otero JE, Gao Y, Shah AS. Patient Factors Systematically  
436 Influence Hospital Length of Stay in Common Orthopaedic Procedures. Iowa Orthop J.  
437 2017;37:233–7.
- 438 3. Buttigieg SC, Abela L, Pace A. Variables affecting hospital length of stay: a scoping review. J  
439 Health Organ Manag. 2018;32:463–93.
- 440 4. Khosravizadeh O, Vatankhah S, Jahanpour M, Yousefzadeh N, Shahsavari S, Yari S. Predicting  
441 inpatient length of stay in Iranian Hospital: Conceptualization and validation. Asian Pacific J  
442 Cancer Prev. 2020;21:2439–46.
- 443 5. Marfil-GarzaID BA, , Pablo F. Belaunzara'n-ZamudioID AG-H, ZuñigaID AC, , Yanink Caro-  
444 Vega DK-S, Sifuentes-Osornio J. Risk factors associated with prolonged hospital length-of-stay:  
445 18-year retrospective study of hospitalizations in a tertiary healthcare center in Mexico. PLoS One.

- 446 2018;13:1–14.
- 447 6. Lee SY, Lee SH, Tan JHH, Foo HSL, Phan PH, Kow AWC, et al. Factors associated with  
448 prolonged length of stay for elective hepatobiliary and neurosurgery patients: a retrospective  
449 medical record review. *BMC Health Serv Res*. 2018;18:5.
- 450 7. Khan B, Haqqani U, Ullah S, Hamayun S, Bibi Z, Khanzada K. Duration of In-hospital Stay for  
451 Elective Neurosurgical Procedures in a Tertiary Care Hospital. *Cureus*. 2021;13.
- 452 8. Biccard BM, Madiba TE, Kluyts HL, Munlemvo DM, Madzimbamuto FD, Basenero A, et al.  
453 Perioperative patient outcomes in the African Surgical Outcomes Study: a 7-day prospective  
454 observational cohort study. *Lancet*. 2018;391:1589–98.
- 455 9. Doctoroff L, Herzig SJ. Predicting patients at risk for prolonged hospital stays. *Med Care*.  
456 2020;58:778–84.
- 457 10. Lagasse J. Average length of stay in hospitals [Internet]. 2022. Available from:  
458 <https://www.healthcarefinancenews.com/news/aha-average-length-stay-hospitals-19>
- 459 11. Ofori-Asenso R, Liew D, Mårtensson J, Jones D. The frequency of, and factors associated with  
460 prolonged hospitalization: A multicentre study in Victoria, Australia. *J Clin Med*. 2020;9:1–14.
- 461 12. Bo M, Fonte G, Pivaro F, Bonetto M, Comi C, Giorgis V, et al. Prevalence of and factors  
462 associated with prolonged length of stay in older hospitalized medical patients. *Geriatr Gerontol*  
463 *Int*. 2016;16:314–21.
- 464 13. Chinedu I. Ossai, David Rankin NW. Extended Length of Hospital Stay in Orthopedic  
465 Surgery.pdf. *Hawaii Int Conf Syst Sci*. 2023. p. 3165–74.
- 466 14. Mosadeghrad AM, Esfahani P. Patients’ unnecessary length of stay in Iran: A systematic  
467 review and meta-analysis. *Jundishapur Sci Med J*. 2019;17:529–44.
- 468 15. Besa JJ V., Masamayor EMI, Tamondong-Lachica DR, Palileo-Villanueva LM. Prevalence

- 469 and predictors of prolonged length of stay among patients admitted under general internal medicine  
470 in a tertiary government hospital in Manila, Philippines: a retrospective cross-sectional study.  
471 BMC Health Serv Res. 2023;23:1–8.
- 472 16. Almashrafi A, Alsabti H, Mukaddirov M, Balan B, Aylin P. Factors associated with prolonged  
473 length of stay following cardiac surgery in a major referral hospital in Oman: A retrospective  
474 observational study. BMJ Open. 2016;6:1–7.
- 475 17. Ilesanmi O. Length of Stay of Surgical Inpatients at University College Hospital, Ibadan,  
476 Nigeria. Br J Med Med Res. 2014;4:1992–2001.
- 477 18. Tefera GM, Feyisa BB, Umata GT, Kebede TM. Predictors of prolonged length of hospital  
478 stay and in-hospital mortality among adult patients admitted at the surgical ward of Jimma  
479 University medical center, Ethiopia: Prospective observational study. J Pharm Policy Pract.  
480 2020;13:1–11.
- 481 19. Fetene D, Tekalegn Y, Abdela J, Aynalem A, Bekele G, Molla E. Prolonged Length of Hospital  
482 Stay And Associated Factors Among Patients Admitted At A Surgical Ward In Selected Public  
483 Hospitals Arsi Zone, Oromia, Ethiopia. medRxiv; 2022. p. 1–16.
- 484 20. Barak Corren Y, Merrill J, Wilkinson R, Cannon C, Bickel J, Reis BY. Predicting surgical  
485 department occupancy and patient length of stay in a paediatric hospital setting using machine  
486 learning: a pilot study. BMJ Heal Care Informatics. 2022;29.
- 487 21. Khosravizadeh O, Vatankhah S, Bastani P, Kalhor R, Alirezaei S, Doosty F. Factors affecting  
488 length of stay in teaching hospitals of a middle-income country. Electron physician. 2016;8:3042–  
489 7.
- 490 22. Kobayashi K, Ando K, Kato F, Kanemura T, Sato K, Hachiya Y, et al. Predictors of Prolonged  
491 Length of Stay After Lumbar Interbody Fusion: A Multicenter Study. Glob Spine J. 2019;9:466–

492 72.

493 23. Patel S, Alshami A, Douedi S, Campbell N, Hossain M, Mushtaq A, et al. Improving hospital  
494 length of stay: Results of a retrospective cohort study. *Healthc.* 2021;9:2–11.

495 24. Soltani S, Kasnavieh MH, Shaker H, Abbasian A, Amanollahi A, Tahmasebi A. Evaluation of  
496 inappropriate admission and hospitalization according to appropriateness evaluation protocol and  
497 estimation of direct financial burden. *Shiraz E Med J.* 2019;20:1–8.

498 25. Hindi MN, Dandurand C, Ailon T, Boyd M, Charest-Morin R, Dea N, et al. Factors  
499 contributing to a longer length of stay in adults admitted to a quaternary spinal care center. *Eur*  
500 *Spine J.* 2023;

501 26. Lorenzoni L, Marino A. Understanding variations in hospital length of stay and cost: Results  
502 of a pilot project. *OECD Heal Work Pap.* 2017;1–42.

503 27. Mitchell BG, Ferguson JK, Anderson M, Sear J, Barnett A. Length of stay and mortality  
504 associated with healthcare-associated urinary tract infections: A multi-state model. *J Hosp Infect.*  
505 2016;93:92–9.

506 28. O’Sullivan K, Martensson J, Robbins R, Farley KJ, Johnson D, Jones D. Epidemiology of  
507 long-stay patients in a university teaching hospital. *Intern Med J.* 2017;47:513–21.

508 29. Mathew PJ, Jehan F, Kulvatunyou N, Khan M, O’Keeffe T, Tang A, et al. The burden of excess  
509 length of stay in trauma patients. *Am J Surg.* 2018;216:881–5.

510 30. Arab-Zozani M, Pezeshki MZ, Khodayari-Zarnaq R, Janati A. Inappropriate Rate of  
511 Admission and Hospitalization in the Iranian Hospitals: A Systematic Review and Meta-Analysis.  
512 *Value Heal Reg Issues.* 2020;21:105–12.

513 31. Abdullah HR, Sim YE, Hao Y, Lin GY, Liew GHC, Lamoureux EL, et al. Association between  
514 preoperative anaemia with length of hospital stay among patients undergoing primary total knee

- 515 arthroplasty in Singapore: A single-centre retrospective study. *BMJ Open*. 2017;7:1–5.
- 516 32. Fletcher R, Deal R, Kubasiak J, Torquati A, Omotosho P. Predictors of Increased Length of  
517 Hospital Stay Following Laparoscopic Sleeve Gastrectomy from the National Surgical Quality  
518 Improvement Program. *J Gastrointest Surg*. 2018;22:274–8.
- 519 33. Baniyadi T, Ghazisaeedi M, Hassaniazad M, Kalhori SRN, Shahi M. A Study of Factors  
520 Affecting on Patients’ Length of Stay in a Surgical Ward: Toward Optimization by Technology-  
521 based Solutions. *Res Sq*. 2019;1–20.
- 522 34. Siddique SM, Tipton K, Leas B, Greysen SR, Mull NK, Lane-Fall M, et al. Interventions to  
523 Reduce Hospital Length of Stay in High-risk Populations: A Systematic Review. *JAMA Netw*  
524 *Open*. 2021;4:1–13.
- 525 35. Burssa D, Teshome A, Iverson K, Ahearn O. Safe Surgery for All : Early Lessons from  
526 Implementing a National Government-Driven Surgical Plan in Ethiopia. *World J Surg*.  
527 2017;41:3038–45.
- 528 36. Anaesthesia. Addressing priorities for surgical research in Africa : implementation of a  
529 multicentre cloud-based peri-operative registry in Ethiopia. *Netw Perioper Care* |. 2021;76:933–9.
- 530 37. Sharfeldin A. Inappropriateness of Hospital Admission, Hospital Stay and Bed Utilization at  
531 Monufia University Hospitals, Egypt. *Egypt Fam Med J*. 2019;3:113–28.
- 532 38. Li H, Tao H, Li G. Predictors and reasons for inappropriate hospitalization days for surgical  
533 patients in a tertiary hospital in Wuhan, China: a retrospective study. *BMC Health Serv Res*.  
534 2021;21:1–14.
- 535 39. Mekonen EG, Gebrie MH, Melkamu S. Magnitude and associated factors of medication  
536 administration error among nurses working in Amhara Region Referral Hospitals , Northwest  
537 Ethiopia. *J Drug Assess*. 2020;9:151–8.

- 538 40. Belayneh AG, Temachu YZ, Messelu MA, Gebrie MH. Prolonged length of stay and its  
539 associated factors at adult emergency department in amhara region comprehensive specialized  
540 hospitals, northwest Ethiopia. *BMC Emerg Med.* 2023;23:34.
- 541 41. Girma M, Wodajo S, Ademe S, Edmealem A, W/Silasie M, Mesafint G. Health-Related  
542 Quality of Life and Associated Factors Among Type Two Diabetic Patients on Follow-Up in  
543 Dessie Comprehensive Specialized Hospital, Dessie, North East Ethiopia, 2020. *Diabetes Metab  
544 Syndr Obes.* 2020;13:4529–41.
- 545 42. Duke GJ, Moran JL, Bersten AD, Bihari S, Roodenburg O, Karnon J, et al. Hospital-acquired  
546 complications: the relative importance of hospital- and patient-related factors. *Med J Aust.*  
547 2022;216:242–7.
- 548 43. Choorapoikayil S, Wittmann M, Marschall U, Thoma J, Schwendner K, Stark P. Preoperative  
549 Anaemia in Primary Hip and Knee Arthroplasty Präoperative Anämie in der Hüft- und  
550 Kniegelenkendoprothetik Authors. *Z Orthop Unfall.* 2020;158:194–200.
- 551 44. Collins TC, Daley J, Henderson WH, Khuri SF. Risk factors for prolonged length of stay after  
552 major elective surgery. *Ann Surg.* 1999;230:251–9.
- 553 45. DHS E. Ethiopia-DHS-2016-2nd-survey-EquityTool. 2016.
- 554 46. Beckers D, Buck M. Activities of Daily Living. *PNF Pract.* StatPearls Publishing; 2021. p.  
555 321–9.
- 556 47. Dasenbrock HH, Liu KX, Devine CA, Chavakula V, Smith TR, Gormley WB, et al. Length of  
557 hospital stay after craniotomy for tumor: A National Surgical Quality Improvement Program  
558 analysis. *Neurosurg Focus.* 2015;39:1–17.
- 559 48. Radomski M, Zenati M, Novak S, Tam V, Steve J, Bartlett DL, et al. Factors associated with  
560 prolonged hospitalization in patients undergoing pancreatoduodenectomy. *Am J Surg.*

- 561 2018;215:636–42.
- 562 49. Wałędziak M, Lasek A, Wysocki M, Su M, Bobowicz M, Myśliwiec P, et al. Risk factors for  
563 serious morbidity, prolonged length of stay and hospital readmission after laparoscopic  
564 appendectomy - results from Pol-LA (Polish Laparoscopic Appendectomy) multicenter large  
565 cohort study. *Sci Rep.* 2019;9:1–9.
- 566 50. Almogati JG, Ahmed EO. Glycated Hemoglobin as a Predictor of the Length of Hospital Stay  
567 in Patients Following Coronary Bypass Graft Surgery in the Saudi Population. *Braz J Cardiovasc*  
568 *Surg.* 2019;34:28–32.
- 569 51. Meshesha BR, Sibhatu MK, Beshir HM, Zewude WC, Taye DB, Getachew EM, et al. Access  
570 to surgical care in Ethiopia : a cross - sectional retrospective data review. *BMC Health Serv Res.*  
571 2022;9:1–12.
- 572 52. Manosroi W, Koetsuk L, Phinyo P, Danpanichkul P, Atthakomol P. Predictive model for  
573 prolonged length of hospital stay in patients with osteoporotic femoral neck fracture: A 5-year  
574 retrospective study. *Front Med.* 2022;9:1–9.
- 575 53. Bidary S, Pandey S, Gupta HK, Aryal R BK. Original Research Article Length Of Hospital  
576 Stay Of Orthopaedic Inpatients In A Tertiary Care Teaching. *J Chitwan Med Coll.* 2021;11:78–  
577 82.
- 578 54. Symuacm H, Zayas-Castro JL. Prediction of chronic disease-related inpatient prolonged length  
579 of stay using machine learning algorithms. *Healthc Inform Res.* 2020;26:20–33.
- 580 55. Wu J, Kong G, Lin Y, Chu H, Yang C, Shi Y, et al. Development of a scoring tool for predicting  
581 prolonged length of hospital stay in peritoneal dialysis patients through data mining. *Ann Transl*  
582 *Med.* 2020;8:1437–1437.
- 583 56. Crane MJ, Xu Y, Henry Jr WL, Gillis SP, Albina JE, Jamieson AM. Pulmonary influenza A



584 virus infection leads to suppression of the innate immune response to dermal injury. PLoS Pathog.  
585 2018;14.

586 57. Song X, Xia C, Li Q, Yao C, Yao Y, Chen D, et al. Perioperative predictors of prolonged  
587 length of hospital stay following total knee arthroplasty: A retrospective study from a single center  
588 in China. BMC Musculoskelet Disord. 2020;21:1–8.  
589

**Length of hospital stay**

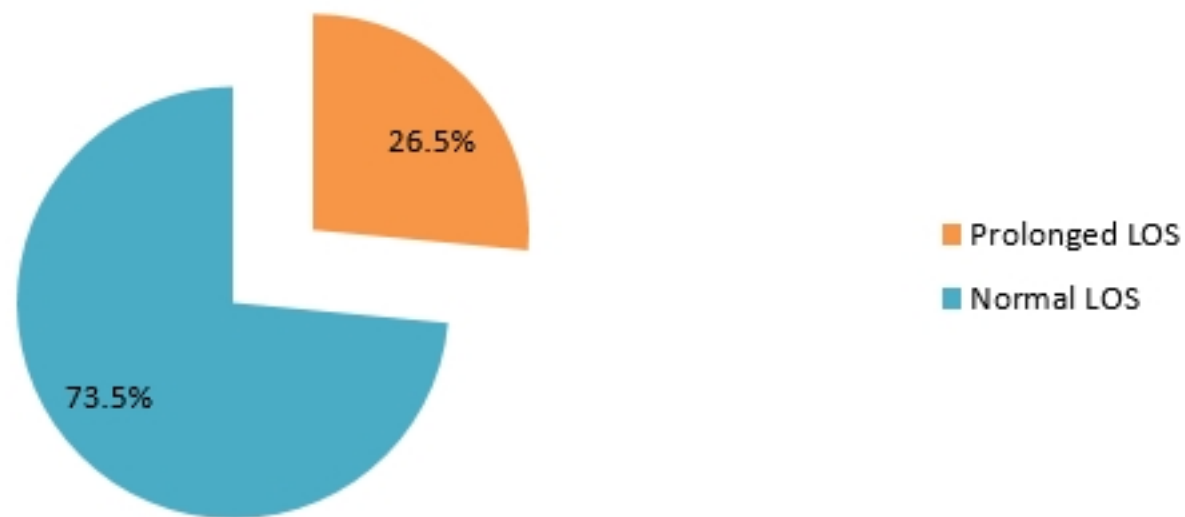

Figure

**Average length of hospital stay by surgery procedures**

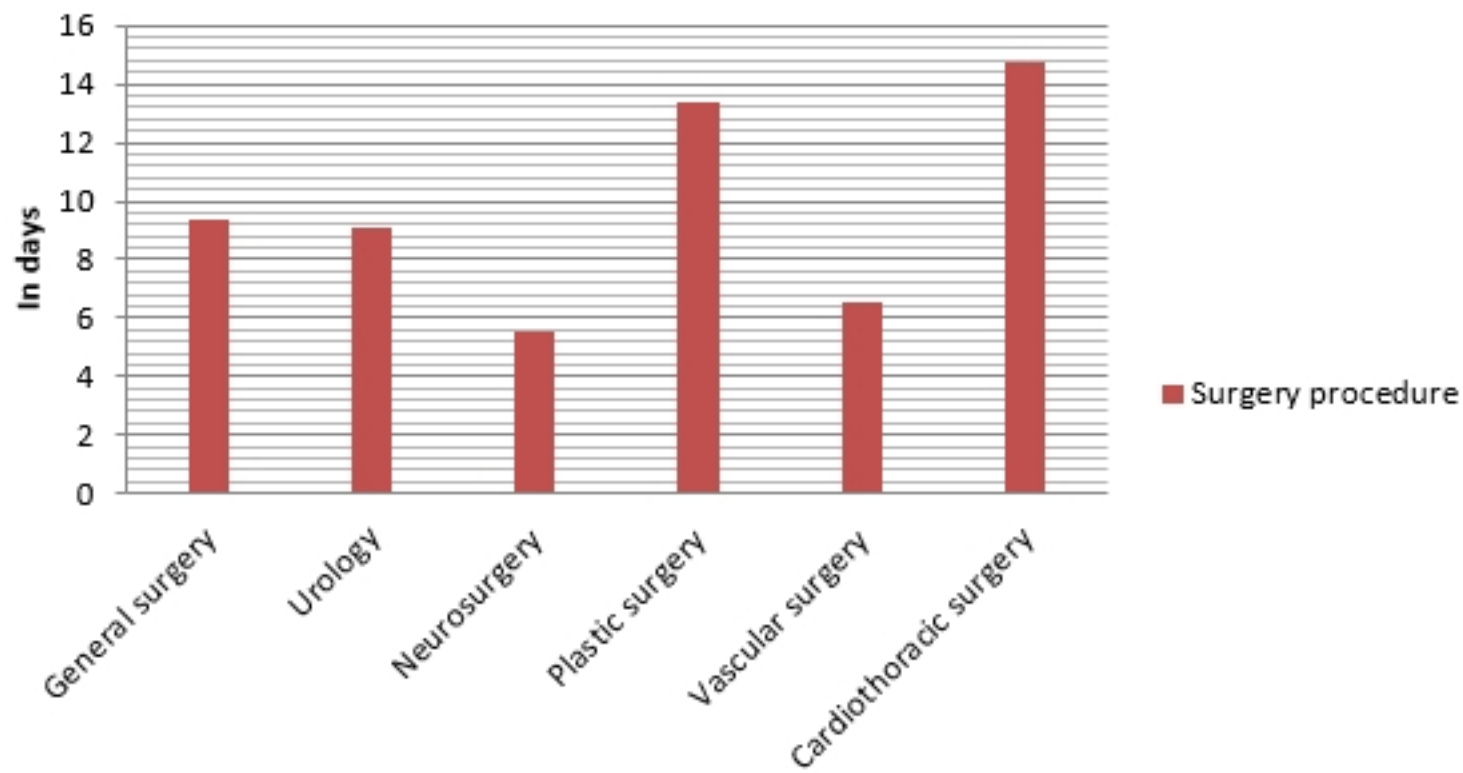

Figure
